# Supplementary material for: Brain resting‐state networks in adolescents with high‐functioning autism: Analysis of spatial connectivity and temporal neurodynamics
Source: PubMed Central journal article supplement (PMC5822569; doi:10.1002/brb3.878), 2018-01-17
Supplement: BRB3-8-e00878-s002.pdf [file BRB3-8-e00878-s002.pdf]

## SI2 - Supporting information

### 1-back task fMRI protocol

The following procedure and parameters were used for the 1-back visual working memory task.

#### 1-back Task description

The 1-back task looks at processing complex stimuli: social and non-social. The non-social complex stimuli are homes, the social complex stimuli are faces.

The participant should not remember one specific house / face, but consider whether two photos in a row are exactly the same. The participant should remember, not only the identity of the house / face, but also the specific feature (house: upper or lower adjusted / face: emotion angry, happy, fear).

Participant is instructed to press the “yes” button if the picture he/she are seeing is an exact copy of the previous one, and press the “no” button otherwise.

Here an example:

Sequentially (from left to right) the pictures are displayed as below. Red dots means what the participant should respond when he/she sees that very picture. The task alternates randomly between the houses and the faces (see next paragraph).

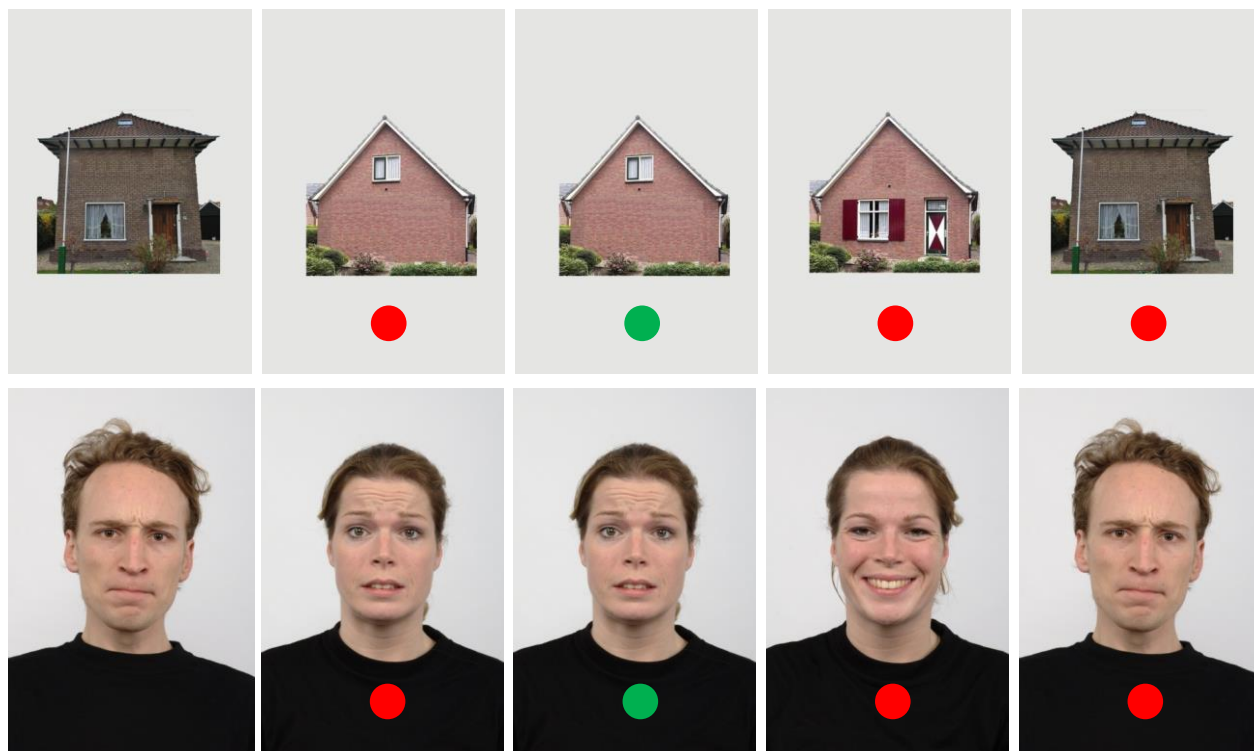

## Task procedure

Before the participant goes into the scanner, the task will be practiced outside the scanner. The participant has already had extensive instructions (and practiced with the task) outside the scanner. The instructions in the scanner must therefore be limited to the literal instructions of the task as shown on the screen.

- During the anatomical scan, the participant can read the instructions on screen again.
- Before starting the fMRI scan: Read the instructions on the screen literally with the participant and see if he / she has any questions.
- Start the fMRI scan if the participant does not have any questions the fMRI scan. The task will then automatically start and run with the scan.

Note: If the participants wants feedback: Indicate that you cannot give it now because everything needs to be analyzed first and only if a group of people has been tested.

## Task design

Below, the schedule for displaying the picture used for the 1-back visual task (1-minute period and at 50% task duty cycle).

| 8 min 1-back |           | minuut 1 |           | minuut 2 |           | minuut 3 |           | minuut 4 |           | minuut 5 |           | minuut 6 |           | minuut 7 |           | minuut 8              |  |
|--------------|-----------|----------|-----------|----------|-----------|----------|-----------|----------|-----------|----------|-----------|----------|-----------|----------|-----------|-----------------------|--|
| H28          | 1500 ms   | F72      | 1500 ms   | H37      | 1500 ms   | H17      | 1500 ms   | F41      | 1500 ms   | H2       | 1500 ms   | F69      | 1500 ms   | F6       | 1500 ms   |                       |  |
| P0           | 500 ms    | P0       | 500 ms    | P0       | 500 ms    | P0       | 500 ms    | P0       | 500 ms    | P0       | 500 ms    | P0       | 500 ms    | P0       | 500 ms    |                       |  |
| H30          | 1500 ms   | F72      | 1500 ms   | H40      | 1500 ms   | H17      | 1500 ms   | F64      | 1500 ms   | H2       | 1500 ms   | F14      | 1500 ms   | F6       | 1500 ms   |                       |  |
| P0           | 500 ms    | P0       | 500 ms    | P0       | 500 ms    | P0       | 500 ms    | P0       | 500 ms    | P0       | 500 ms    | P0       | 500 ms    | P0       | 500 ms    |                       |  |
| H30          | 1500 ms   | F80      | 1500 ms   | H40      | 1500 ms   | H10      | 1500 ms   | F3       | 1500 ms   | H2       | 1500 ms   | F15      | 1500 ms   | F43      | 1500 ms   |                       |  |
| P0           | 500 ms    | P0       | 500 ms    | P0       | 500 ms    | P0       | 500 ms    | P0       | 500 ms    | P0       | 500 ms    | P0       | 500 ms    | P0       | 500 ms    |                       |  |
| H30          | 1500 ms   | F80      | 1500 ms   | H1       | 1500 ms   | H12      | 1500 ms   | F2       | 1500 ms   | H6       | 1500 ms   | F15      | 1500 ms   | F43      | 1500 ms   |                       |  |
| P0           | 500 ms    | P0       | 500 ms    | P0       | 500 ms    | P0       | 500 ms    | P0       | 500 ms    | P0       | 500 ms    | P0       | 500 ms    | P0       | 500 ms    |                       |  |
| H43          | 1500 ms   | F37      | 1500 ms   | H3       | 1500 ms   | H33      | 1500 ms   | F2       | 1500 ms   | H6       | 1500 ms   | F40      | 1500 ms   | F45      | 1500 ms   |                       |  |
| P0           | 500 ms    | P0       | 500 ms    | P0       | 500 ms    | P0       | 500 ms    | P0       | 500 ms    | P0       | 500 ms    | P0       | 500 ms    | P0       | 500 ms    |                       |  |
| H43          | 1500 ms   | F38      | 1500 ms   | H9       | 1500 ms   | H36      | 1500 ms   | F2       | 1500 ms   | H22      | 1500 ms   | F17      | 1500 ms   | F25      | 1500 ms   |                       |  |
| P0           | 500 ms    | P0       | 500 ms    | P0       | 500 ms    | P0       | 500 ms    | P0       | 500 ms    | P0       | 500 ms    | P0       | 500 ms    | P0       | 500 ms    |                       |  |
| H25          | 1500 ms   | F38      | 1500 ms   | H41      | 1500 ms   | H39      | 1500 ms   | F9       | 1500 ms   | H23      | 1500 ms   | F17      | 1500 ms   | F28      | 1500 ms   |                       |  |
| P0           | 500 ms    | P0       | 500 ms    | P0       | 500 ms    | P0       | 500 ms    | P0       | 500 ms    | P0       | 500 ms    | P0       | 500 ms    | P0       | 500 ms    |                       |  |
| H27          | 1500 ms   | F55      | 1500 ms   | H8       | 1500 ms   | H53      | 1500 ms   | F9       | 1500 ms   | H16      | 1500 ms   | F17      | 1500 ms   | F28      | 1500 ms   |                       |  |
| P0           | 500 ms    | P0       | 500 ms    | P0       | 500 ms    | P0       | 500 ms    | P0       | 500 ms    | P0       | 500 ms    | P0       | 500 ms    | P0       | 500 ms    |                       |  |
| H44          | 1500 ms   | F55      | 1500 ms   | H8       | 1500 ms   | H54      | 1500 ms   | F10      | 1500 ms   | H31      | 1500 ms   | F18      | 1500 ms   | F28      | 1500 ms   |                       |  |
| P0           | 500 ms    | P0       | 500 ms    | P0       | 500 ms    | P0       | 500 ms    | P0       | 500 ms    | P0       | 500 ms    | P0       | 500 ms    | P0       | 500 ms    |                       |  |
| H44          | 1500 ms   | F67      | 1500 ms   | H4       | 1500 ms   | H54      | 1500 ms   | F79      | 1500 ms   | H20      | 1500 ms   | F48      | 1500 ms   | F31      | 1500 ms   |                       |  |
| P0           | 500 ms    | P0       | 500 ms    | P0       | 500 ms    | P0       | 500 ms    | P0       | 500 ms    | P0       | 500 ms    | P0       | 500 ms    | P0       | 500 ms    |                       |  |
| H34          | 1500 ms   | F67      | 1500 ms   | H5       | 1500 ms   | H54      | 1500 ms   | F5       | 1500 ms   | H21      | 1500 ms   | F48      | 1500 ms   | F32      | 1500 ms   |                       |  |
| P0           | 500 ms    | P0       | 500 ms    | P0       | 500 ms    | P0       | 500 ms    | P0       | 500 ms    | P0       | 500 ms    | P0       | 500 ms    | P0       | 500 ms    |                       |  |
| H34          | 1500 ms   | F67      | 1500 ms   | H45      | 1500 ms   | H13      | 1500 ms   | F8       | 1500 ms   | H21      | 1500 ms   | F56      | 1500 ms   | F32      | 1500 ms   |                       |  |
| P0           | 500 ms    | P0       | 500 ms    | P0       | 500 ms    | P0       | 500 ms    | P0       | 500 ms    | P0       | 500 ms    | P0       | 500 ms    | P0       | 500 ms    |                       |  |
| H34          | 1500 ms   | F34      | 1500 ms   | H45      | 1500 ms   | H15      | 1500 ms   | F66      | 1500 ms   | H21      | 1500 ms   | F21      | 1500 ms   | F76      | 1500 ms   |                       |  |
| P0           | 500 ms    | P0       | 500 ms    | P0       | 500 ms    | P0       | 500 ms    | P0       | 500 ms    | P0       | 500 ms    | P0       | 500 ms    | P0       | 500 ms    |                       |  |
| H7           | 1500 ms   | F34      | 1500 ms   | H51      | 1500 ms   | H26      | 1500 ms   | F50      | 1500 ms   | H49      | 1500 ms   | F22      | 1500 ms   | F76      | 1500 ms   |                       |  |
| P0           | 500 ms    | P0       | 500 ms    | P0       | 500 ms    | P0       | 500 ms    | P0       | 500 ms    | P0       | 500 ms    | P0       | 500 ms    | P0       | 500 ms    |                       |  |
| H7           | 1500 ms   | F33      | 1500 ms   | H47      | 1500 ms   | H26      | 1500 ms   | F75      | 1500 ms   | H49      | 1500 ms   | F63      | 1500 ms   | F51      | 1500 ms   |                       |  |
| P0           | 500 ms    | P0       | 500 ms    | P0       | 500 ms    | P0       | 500 ms    | P0       | 500 ms    | P0       | 500 ms    | P0       | 500 ms    | P0       | 500 ms    |                       |  |
| P0           | 30.000 ms | P0       | 30.000 ms | P0       | 30.000 ms | P0       | 30.000 ms | P0       | 30.000 ms | P0       | 30.000 ms | P0       | 30.000 ms | P0       | 30.000 ms | Einde eert: 30.000 ms |  |

H = House picture; F = Face picture; P0 = Rest
